# Supplementary material
Source: PubMed Central journal article supplement (PMC548341)

## Supporting Information

TABLE S1. Comparison of base proton chemical shifts predicted by SHIFTS 4.1. for the AGGG duplex with the observed proton shifts.

| Proton | Predicted order | Predicted shift (ppm) | Observed order | Observed Shift (ppm) |
|--------|-----------------|-----------------------|----------------|----------------------|
| CH3    | THY 5           | 1.21                  | THY 5          | 1.218                |
|        | THY 11          | 1.26                  | THY 11         | 1.314                |
|        | THY 26          | 1.52                  | THY 26         | 1.533                |
|        | THY 6           | 1.55                  | THY 6          | 1.606                |
|        | THY 22          | 1.57                  | THY 22         | 1.633                |
|        | THY 17          | 1.58                  | THY 17         | 1.675                |
| AH2    | ADE 23          | 6.26                  | ADE 23         | 6.945                |
|        | ADE 7           | 6.48                  | ADE 7          | 7.29                 |
|        | ADE 12          | 6.87                  | ADE 12         | 7.43                 |
|        | ADE 18          | 7.39                  | ADE 18         | 7.43                 |
|        | ADE 3           | 7.42                  | ADE 24         | 7.545                |
|        | ADE 24          | 7.94                  | ADE 3          | 7.724                |
| H6/H8  | THY 5           | 7.22                  | THY 5          | 7.143                |
|        | THY 11          | 7.24                  | THY 11         | 7.221                |
|        | THY 22          | 7.29                  | THY 22         | 7.341                |
|        | THY 6           | 7.33                  | THY 6          | 7.341                |
|        | THY 26          | 7.33                  | THY 17         | 7.4                  |
|        | THY 17          | 7.36                  | THY 26         | 7.448                |
|        | GUA 8           | 7.58                  | GU 10          | 7.472                |
|        | GUA 9           | 7.6                   | GU 9           | 7.507                |
|        | GUA 4           | 7.64                  | GU 4           | 7.545                |
|        | GUA 10          | 7.65                  | GU 8           | 7.55                 |
|        | GUA 13          | 7.7                   | GU 13          | 7.679                |
|        | GUA 28          | 7.87                  | GU 2           | 7.938                |
|        | GUA 2           | 7.88                  | GU 28          | 7.957                |
|        | GUA 15          | 7.94                  | GU 15          | 7.986                |
|        | CYT 25          | 7.51                  | CYT 25         | 7.24                 |
|        | CYT 19          | 7.52                  | CYT 19         | 7.29                 |
|        | CYT 14          | 7.58                  | CYT 20         | 7.454                |
|        | CYT 20          | 7.6                   | CYT 27         | 7.472                |
|        | CYT 16          | 7.63                  | CYT 21         | 7.496                |
|        | CYT 21          | 7.63                  | CYT 16         | 7.529                |
|        | CYT 1           | 7.72                  | CYT 14         | 7.54                 |
|        | CYT 27          | 7.72                  | CYT 1          | 7.6                  |
|        | ADE 24          | 8.19                  | ADE 24         | 8.117                |
|        | ADE 3           | 8.3                   | ADE 3          | 8.147                |
|        | ADE 7           | 8.38                  | ADE 7          | 8.171                |
|        | ADE 23          | 8.38                  | ADE 12         | 8.187                |
|        | ADE 18          | 8.43                  | ADE 23         | 8.243                |
| ADE 12 | 8.44            | ADE 18                | 8.302          |                      |

FIGURE S1.  $\text{Fe}^{2+}$ -dependent shifting of aromatic proton resonances within the AGGG-containing duplex. The duplexed sample (0.65 mM) was in 90%  $\text{H}_2\text{O}/10\%$   $\text{D}_2\text{O}$ , 130 mM NaCl. Arrows indicate resonances that undergo significant chemical shift changes.

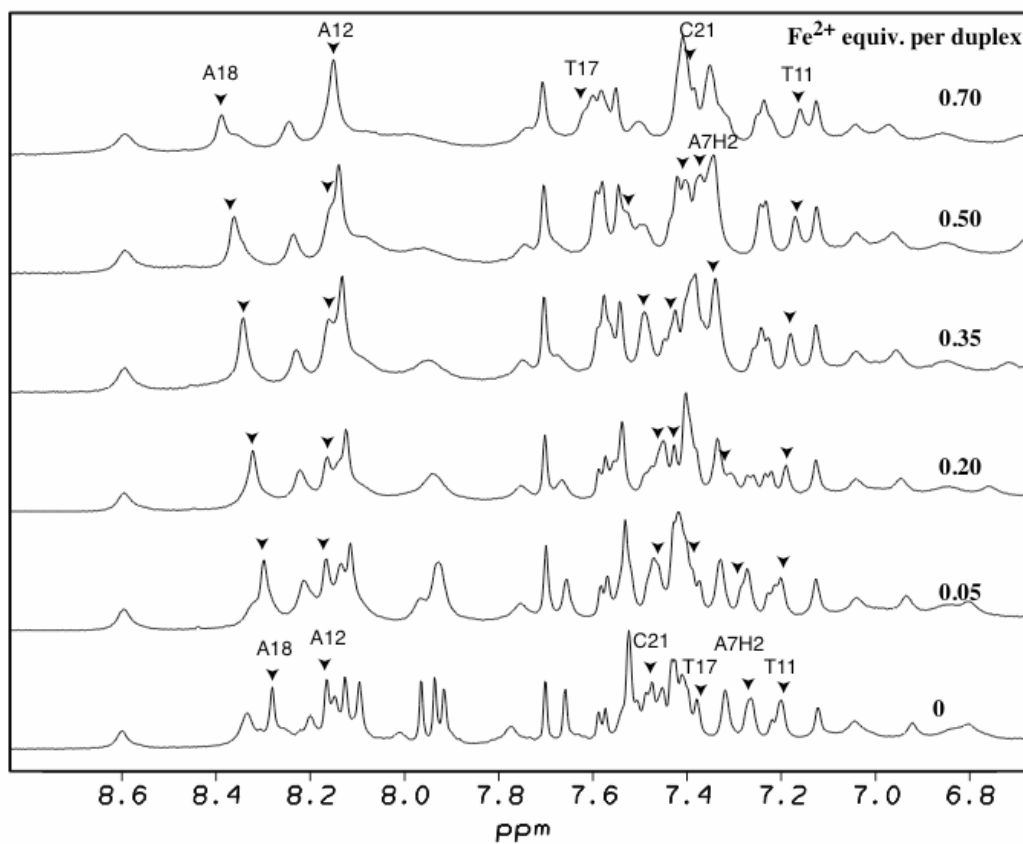

Figure S2. Magnitude and direction of chemical shift changes for the aromatic H6/H8 protons of the various duplexes with 0.5 equivalents of  $\text{Fe}^{2+}$  per duplex.

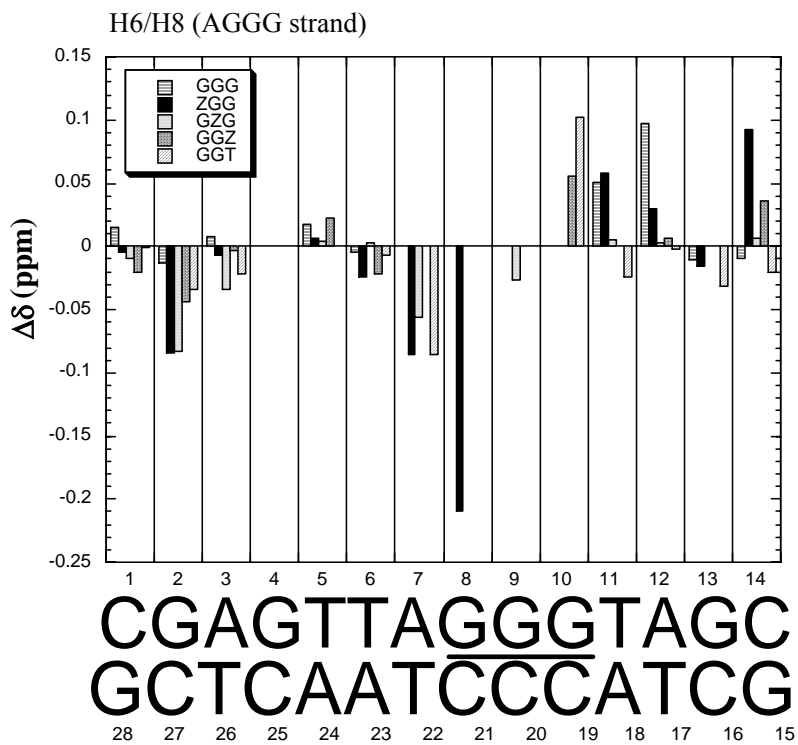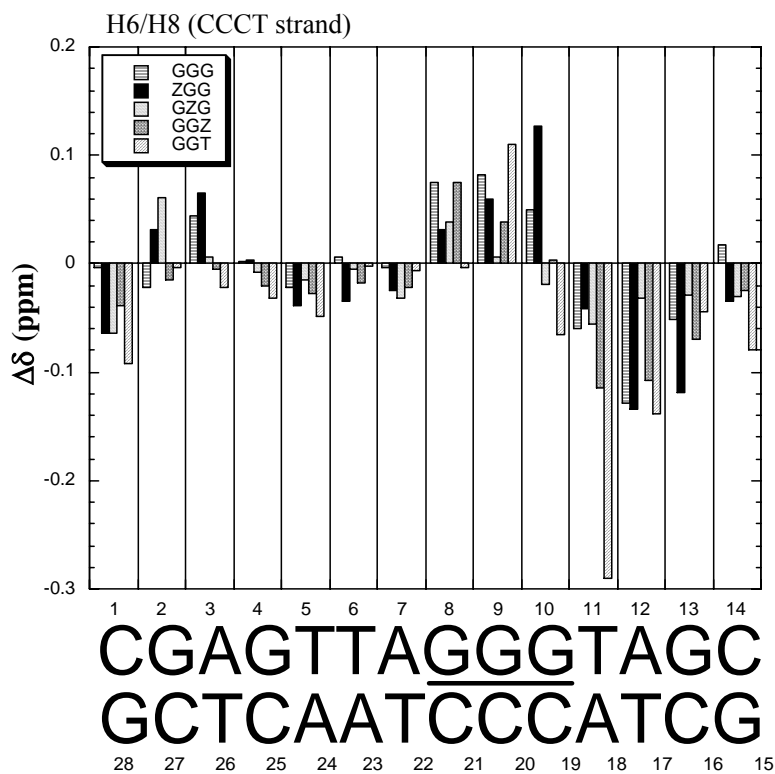

FIGURE S3. Solvent exchangeability of imino protons in the AGGG-containing duplex as a function of  $\text{Fe}^{2+}$  concentration. Imino proton exchangeability was measured on a 1 mM sample in 90%  $\text{H}_2\text{O}/10\%$   $\text{D}_2\text{O}$ , 130 mM NaCl, using the solvent saturation transfer experiment described in Materials and Methods. Peak intensities of imino protons were measured using the cursor in FELIX 97.0 after each addition of  $\text{Fe}^{2+}$ .

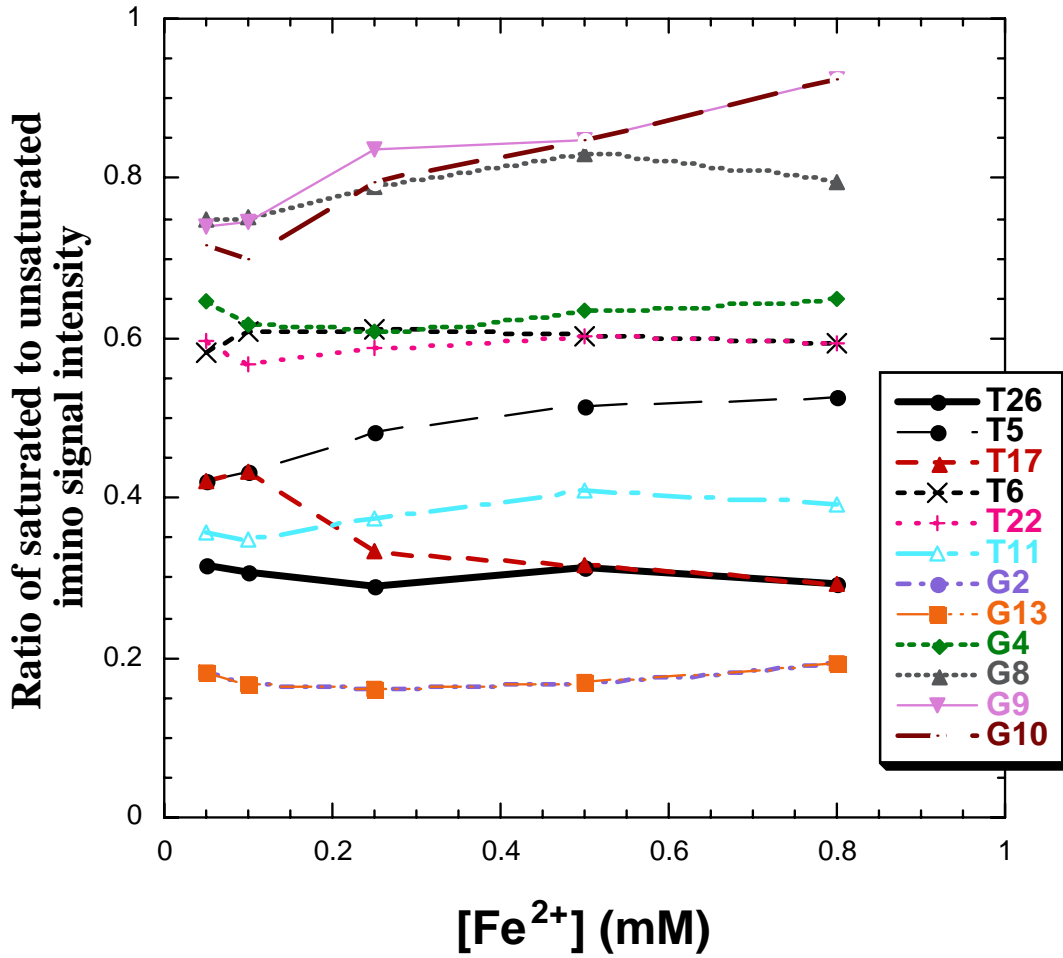

FIGURE S4. Estimation of the dissociation constant  $K_d$  for  $\text{Fe}^{2+}$ -binding at the AGGG sequence. The  $K_d$  was calculated from  $\text{Fe}^{2+}$ -dependent changes in the G9 NH resonance. The data were fitted to the  $K_d$  equation using Kaleidagraph 3.0. The observed changes in chemical shift ( $\Delta\delta_{\text{obs}}$ ) during the course of an  $\text{Fe}^{2+}$  titration were measured by subtracting the peak position (in ppm) of the G9 imino proton resonance from its position in the absence of  $\text{Fe}^{2+}$  ( $\delta_{\text{free}}$ ). These changes were then plotted as a function of total added  $\text{Fe}^{2+}$  concentration,  $[\text{Fe}^{2+}]$ .  $\Delta\delta_{\text{obs}}$  can be defined as:

$$\Delta\delta_{\text{obs}} = 1/\text{DNA}_{\text{total}}[\Delta\delta_{\text{bound}}(\text{Fe}^{2+}_{\text{bound}}) + \Delta\delta_{\text{free}}(\text{DNA}_{\text{total}} - \text{Fe}^{2+}_{\text{bound}})],$$

where:

$\text{Fe}^{2+}_{\text{bound}}/\text{DNA}_{\text{total}}$  is the fractional occupancy,  $F_{\text{bound}}$ ,

$\Delta\delta_{\text{bound}}$  is the chemical shift change when  $F_{\text{bound}} = 1$ ,

$\Delta\delta_{\text{free}}$  is the chemical shift change when  $F_{\text{bound}} = 0$  (by definition,  $\Delta\delta_{\text{free}} = 0$ ), and

$1 - (\text{Fe}^{2+}_{\text{bound}}/\text{DNA}_{\text{total}}) = 1 - F_{\text{bound}}$ .

Using the standard equations involving  $K_d$  and  $F_{\text{bound}}$ ,  $\Delta\delta_{\text{obs}}$  can be expressed as a function of  $[\text{Fe}^{2+}]$  as follows:

$$\Delta\delta_{\text{obs}} = \Delta\delta/(2\text{DNA}_{\text{total}})[(\text{DNA}_{\text{total}} + [\text{Fe}^{2+}] + K_d) - \{(\text{DNA}_{\text{total}} + [\text{Fe}^{2+}] + K_d)^2 - 4(\text{DNA}_{\text{total}})[\text{Fe}^{2+}]\}^{1/2}]$$

where  $\Delta\delta$  is the magnitude of  $\Delta\delta_{\text{bound}}$ . The data were fitted to the above equation with  $[\text{Fe}^{2+}]$  and  $\Delta\delta_{\text{obs}}$  as variables to obtain values for  $K_d$  and limiting shift,  $\Delta\delta$ .

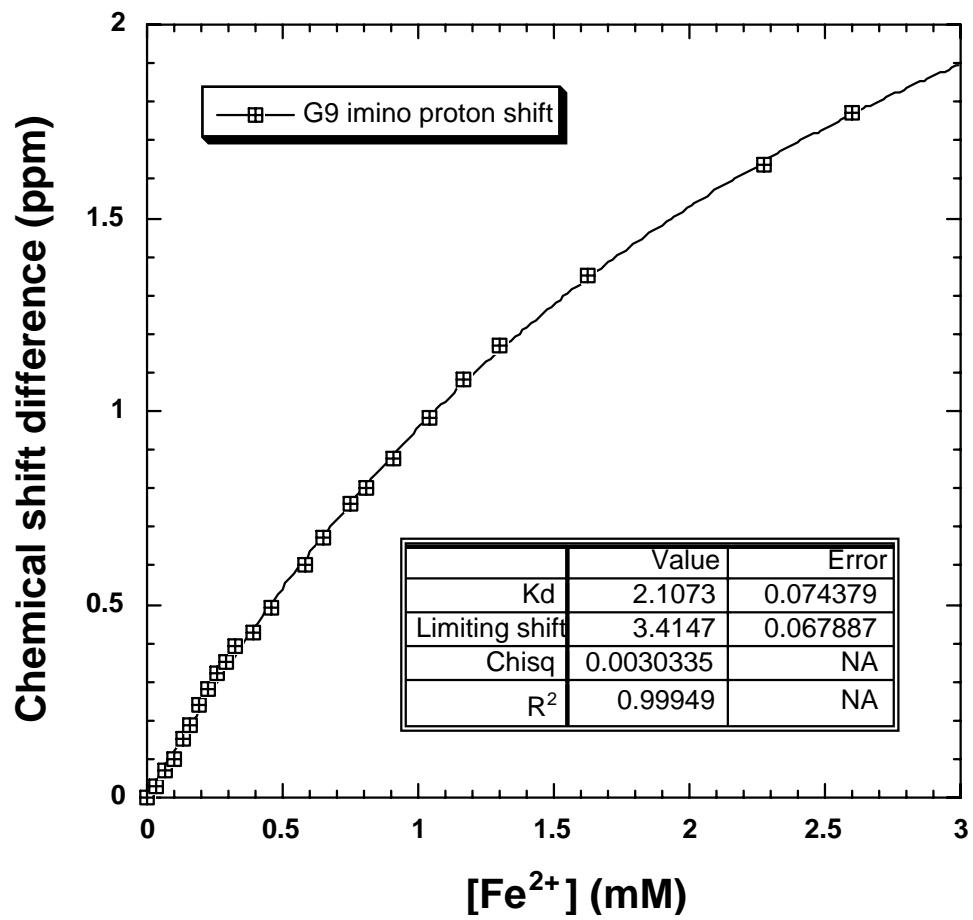

Supplement: nar_33_2_497__1.pdf [file nar_33_2_497__1.pdf]
